# Supplementary material
Source: HighWire-hosted journal article supplement (https://www.cmajopen.ca/highwire/filestream/81045/field_highwire_adjunct_files/0/open-2016-0097-1-at.pdf)
Supplement: open-2016-0097-1-at.pdf [file open-2016-0097-1-at.pdf]

**Appendix 1 (as supplied by the authors):** Diagram of the Concurrent Triangulation Mixed-Methods Design\*

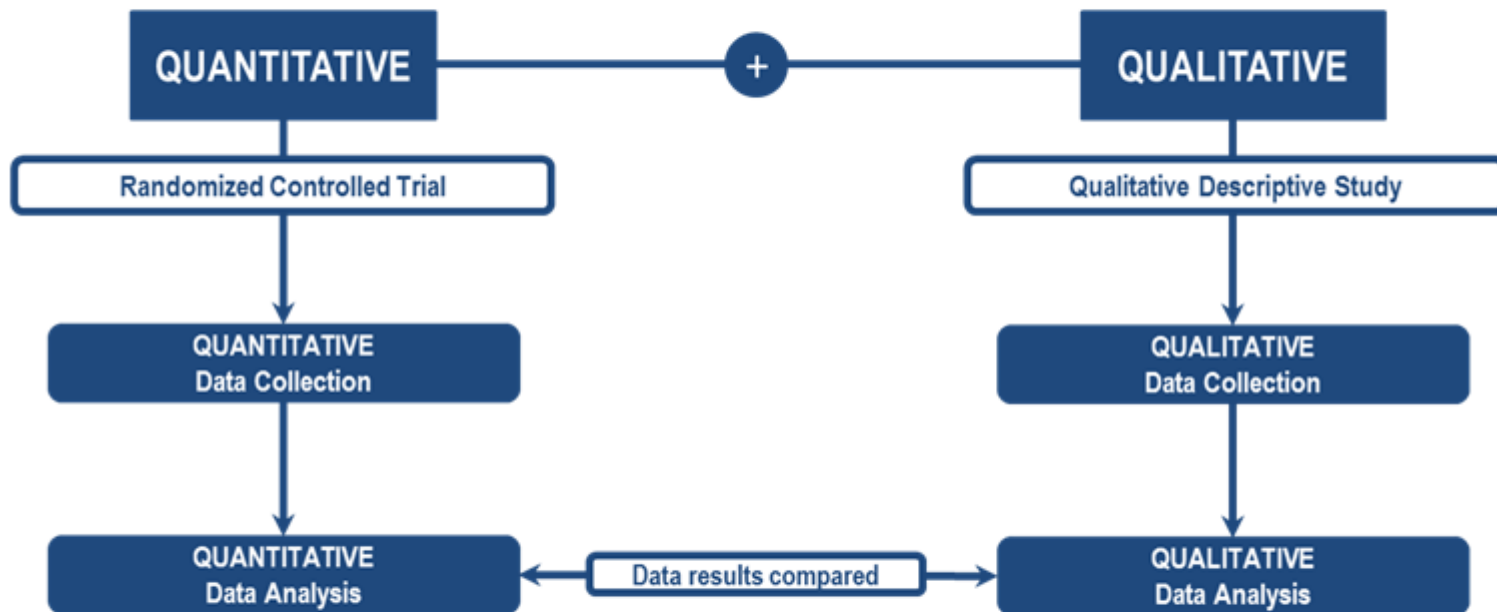

\* Adapted from Creswell 2003, page 214 [24]
